# Supplementary material
Source: Springer Nature journal article supplement (https://www.springermedizin.de/resource/supplementary/12961_2005_24_MOESM4_ESM.pdf/9571310)

Fraction

.6  
.4  
.2  
0

0

5

10

15

giatla

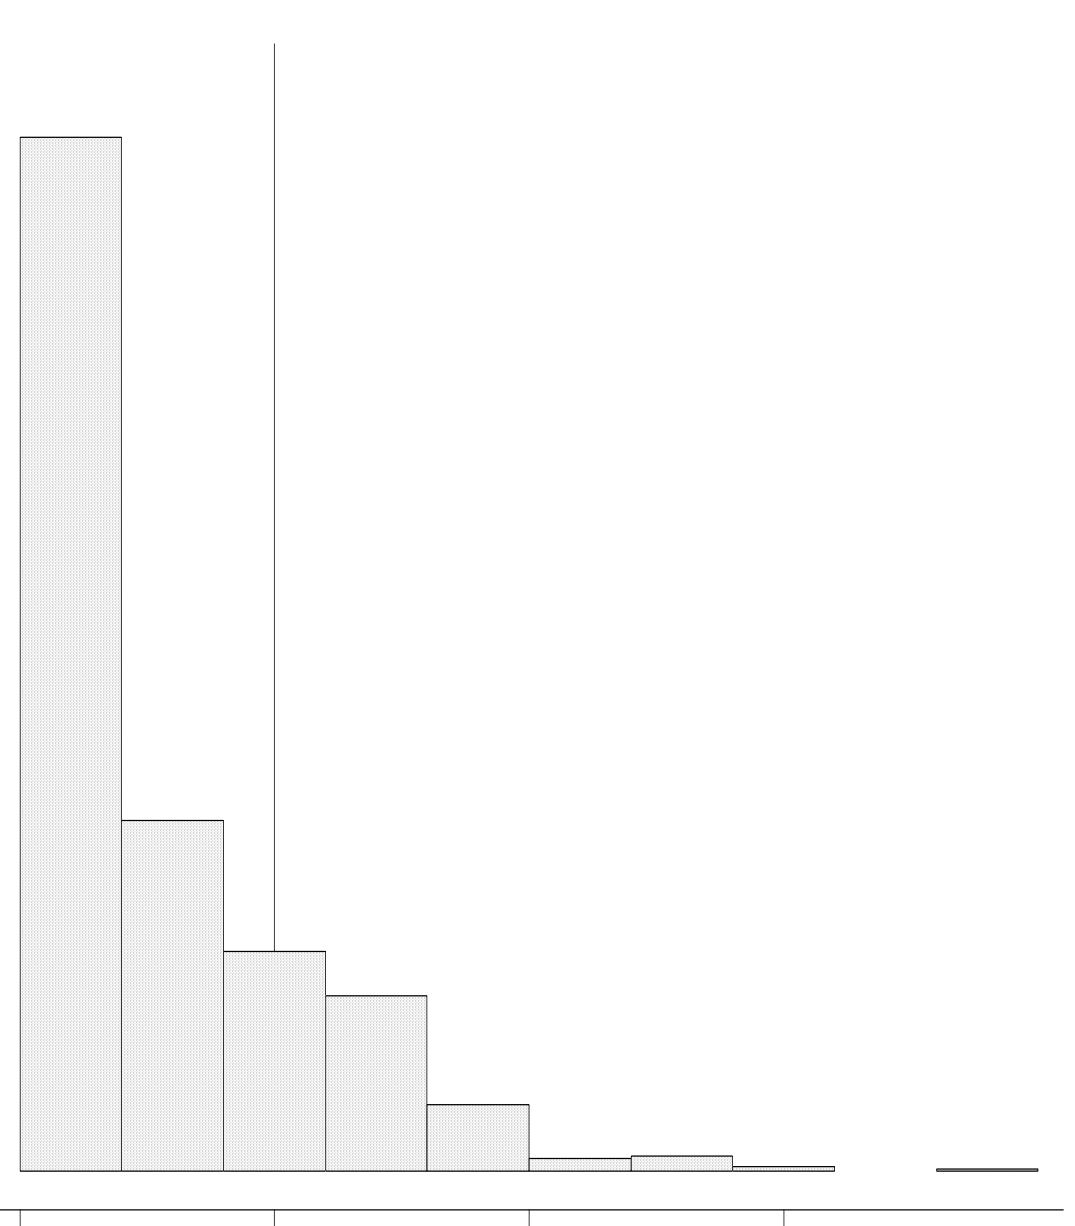

Supplement: MOESM4 [file 9571310]
